# Supplementary material for: Preclinical modeling of metabolic syndrome to study the pleiotropic effects of novel antidiabetic therapy independent of obesity
Source: Springer Nature journal article supplement (doi:10.1038/s41598-024-71202-y), 2024-09-05

**Supplementary Table 1.** Principal component (PC) 1 loadings of significant metabolites from urine (*General Metabolism*) following FS-CR. Positive loadings (shaded) are correlated with **BAS1** and negative are correlated with **BAS2**. Numeric metabolites had a spectral match factor < 800.

| Metabolite                                 | PC1 (29.35%) |
|--------------------------------------------|--------------|
| 406846                                     | -2.10E-01    |
| 401047                                     | -2.05E-01    |
| 222303                                     | -1.79E-01    |
| 34083                                      | -1.75E-01    |
| 389988                                     | -1.65E-01    |
| 18305                                      | -1.64E-01    |
| 127665                                     | -1.63E-01    |
| 520639                                     | -1.56E-01    |
| 6376                                       | -1.53E-01    |
| 33401                                      | -1.52E-01    |
| 112261                                     | -1.36E-01    |
| 356986                                     | -1.27E-01    |
| 2,3-dihydroxybutanoic acid (tartaric acid) | -1.16E-01    |
| arabitol                                   | -1.16E-01    |
| cellobiose                                 | -1.08E-01    |
| alanine-alanine                            | -9.84E-02    |
| 1981                                       | -9.62E-02    |
| 34015                                      | -9.22E-02    |
| glycerol                                   | -6.88E-02    |
| pipecolic acid                             | 8.18E-02     |
| 4929                                       | 8.28E-02     |
| 167348                                     | 8.28E-02     |
| 395930                                     | 9.19E-02     |
| 2'-deoxyguanosine                          | 9.29E-02     |
| piperidone                                 | 9.47E-02     |
| 122843                                     | 1.01E-01     |
| cytosine                                   | 1.04E-01     |
| 118995                                     | 1.04E-01     |
| glycylglycine                              | 1.10E-01     |
| glucose-6-phosphate                        | 1.18E-01     |
| 209677                                     | 1.20E-01     |
| 189936                                     | 1.23E-01     |
| 117201                                     | 1.37E-01     |
| 131989                                     | 1.40E-01     |
| 20903                                      | 1.42E-01     |
| 7543                                       | 1.43E-01     |
| N-acetylmethionine                         | 1.46E-01     |
| 17143                                      | 1.58E-01     |
| 4983                                       | 1.62E-01     |
| pentadecanoic acid                         | 1.64E-01     |
| 118989                                     | 1.65E-01     |
| 209172                                     | 1.70E-01     |
| 105214                                     | 1.74E-01     |
| 404049                                     | 1.80E-01     |
| uric acid                                  | 1.88E-01     |
| nicotinamide                               | 1.97E-01     |
| 379063                                     | 2.06E-01     |
| 210798                                     | 2.16E-01     |

**Supplementary Table 2.** Principal component (PC) 1 loadings of significant metabolites from stool (*General Metabolism*) following FS-CR. Negative loadings (shaded) are correlated with **BAS1** and positive are correlated with **BAS2**. Numeric metabolites had a spectral match factor < 800.

| Variable                | PC 1 (48.59%) |
|-------------------------|---------------|
| cadaverine              | -1.58E-01     |
| 12444                   | -1.55E-01     |
| 87712                   | -1.53E-01     |
| trans-4-hydroxyproline  | -1.44E-01     |
| tryptamine              | -1.43E-01     |
| isopalmitic acid        | -1.22E-01     |
| 4550                    | -7.86E-02     |
| 480022                  | 1.05E-01      |
| fructose                | 1.07E-01      |
| 117201                  | 1.09E-01      |
| 199109                  | 1.23E-01      |
| sinigrin                | 1.27E-01      |
| sophorose               | 1.39E-01      |
| 371546                  | 1.47E-01      |
| 416595                  | 1.56E-01      |
| pipecolinic acid        | 1.57E-01      |
| 209172                  | 1.57E-01      |
| 110429                  | 1.63E-01      |
| 87282                   | 1.65E-01      |
| 20282                   | 1.67E-01      |
| 220224                  | 1.68E-01      |
| 3,6-anhydro-D-galactose | 1.68E-01      |
| phenylacetic acid       | 1.76E-01      |
| 114501                  | 1.78E-01      |
| 127847                  | 1.82E-01      |
| 372458                  | 1.83E-01      |
| erythrose               | 1.84E-01      |
| palmitoleic acid        | 1.85E-01      |
| N-acetyl-D-tryptophan   | 1.86E-01      |
| 528624                  | 1.87E-01      |
| 146226                  | 1.89E-01      |
| 389988                  | 1.96E-01      |
| 2-deoxyerythritol       | 1.97E-01      |
| UDP-glucuronic acid     | 2.03E-01      |
| 18157                   | 2.03E-01      |
| 384914                  | 2.04E-01      |
| 64891                   | 2.05E-01      |

**Supplementary Table 3.** Principal component (PC) 1 loadings of significant metabolites from serum (*General Metabolism*) following FS-CR. Positive loadings (shaded) are correlated with **BAS1** and negative are correlated with **BAS2**. Numeric metabolites had a spectral match factor < 800.

| Variable             | PC1 (82.30%) |
|----------------------|--------------|
| 34089                | -2.97E-01    |
| 346241               | 2.99E-01     |
| 31764                | 3.06E-01     |
| 1380                 | 3.09E-01     |
| 354256               | 3.13E-01     |
| 124484               | 3.23E-01     |
| 3-Amino-2-piperidone | 3.23E-01     |
| 345436               | 3.25E-01     |
| 372458               | 3.30E-01     |
| 2-picolinic acid     | 3.34E-01     |

**Supplementary Table 4.** Principal component (PC) 1 loadings of significant metabolites from urine (*Complex Lipids*) following FS-CR. Positive loadings (shaded) are correlated with **BAS1** and negative are correlated with **BAS2**.

| Variable                   | PC 1 (41.83%) |
|----------------------------|---------------|
| 0.18_172.99                | -1.89E-01     |
| 0.19_148.10                | -1.88E-01     |
| 0.19_245.15                | -1.79E-01     |
| 0.24_312.22                | -1.74E-01     |
| 0.21_305.16                | -1.72E-01     |
| 0.23_260.22                | -1.71E-01     |
| 0.21_569.31                | -1.68E-01     |
| 0.24_215.03                | -1.51E-01     |
| 0.19_212.00                | -1.46E-01     |
| 0.20_192.07                | -1.37E-01     |
| 0.20_238.02                | -1.23E-01     |
| 3.84_934.79                | 9.61E-02      |
| 0.26_152.07                | 1.18E-01      |
| 0.25_382.26                | 1.21E-01      |
| 0.23_297.00                | 1.26E-01      |
| 0.18_135.03                | 1.44E-01      |
| 1.59_568.43                | 1.46E-01      |
| 1.43_584.42                | 1.59E-01      |
| 0.20_124.01                | 1.61E-01      |
| TG 62:14 TG 20:4_20:4_22:6 | 1.62E-01      |
| 0.20_265.15                | 1.62E-01      |
| TG 60:13 TG 20:4_20:4_20:5 | 1.67E-01      |
| 0.20_145.13                | 1.68E-01      |
| 2.48_123.06                | 1.72E-01      |
| 0.19_218.10                | 1.72E-01      |
| 0.20_230.12                | 1.73E-01      |
| 3.54_968.77                | 1.78E-01      |
| 1.52_123.06                | 1.81E-01      |
| 0.26_141.07                | 1.81E-01      |
| 0.60_123.06                | 1.82E-01      |
| 0.24_166.09                | 1.87E-01      |
| 0.21_123.06                | 1.87E-01      |
| 3.21_538.45                | 1.90E-01      |
| 0.21_138.09                | 1.95E-01      |
| 0.21_137.07                | 2.02E-01      |
| 0.30_297.15                | 2.03E-01      |

**Supplementary Table 5.** Principal component (PC) 1 loadings of significant metabolites from stool (*Complex Lipids*) following FS-CR. Positive loadings (shaded) are correlated with **BAS1** and negative are correlated with **BAS2**.

| Variable                        | PC 1 (76.69%) |
|---------------------------------|---------------|
| 1.34_445.37                     | -1.72E-01     |
| 1.33_479.32                     | -1.66E-01     |
| FA 17:0                         | -1.65E-01     |
| 0.94_355.29                     | -1.44E-01     |
| 0.23_324.23                     | 1.30E-01      |
| 2.30_207.10                     | 1.32E-01      |
| 2.30_490.43                     | 1.33E-01      |
| 0.22_453.20                     | 1.39E-01      |
| FA 20:5 (eicosapentaenoic acid) | 1.40E-01      |
| 0.47_380.31                     | 1.40E-01      |
| 4.13_858.79                     | 1.45E-01      |
| 3.78_896.83                     | 1.52E-01      |
| TG 48:4 Isomer A                | 1.55E-01      |
| 4.16_954.83                     | 1.58E-01      |
| 0.22_168.07                     | 1.60E-01      |
| 0.21_495.30                     | 1.60E-01      |
| 0.23_496.31                     | 1.63E-01      |
| 0.23_387.20                     | 1.64E-01      |
| 3.87_974.82                     | 1.64E-01      |
| 0.34_329.18                     | 1.68E-01      |
| 4.07_822.81                     | 1.74E-01      |
| TG 46:3 Isomer A                | 1.75E-01      |
| 4.06_549.49                     | 1.76E-01      |
| TG 55:6 TG 17:1_18:1_20:4       | 1.78E-01      |
| 4.07_976.83                     | 1.80E-01      |
| 0.23_309.16                     | 1.80E-01      |
| TG 62:12 TG 20:3_20:4_22:5      | 1.81E-01      |
| 0.75_304.30                     | 1.82E-01      |
| TG 46:5                         | 1.82E-01      |
| 0.19_162.06                     | 1.83E-01      |
| 0.19_206.05                     | 1.84E-01      |
| 1.55_569.43                     | 1.87E-01      |
| 1.59_568.43                     | 1.87E-01      |
| 2.24_552.43                     | 1.87E-01      |
| 1.36_568.43                     | 1.89E-01      |
| 1.39_568.48                     | 1.89E-01      |

**Supplementary Table 6.** Principal component (PC) 1 loadings of significant metabolites from serum (*Complex Lipids*) following FS-CR. Negative loadings (shaded) are correlated with **BAS1** and positive are correlated with **BAS2**.

| Variable         | PC 1 (82.63%) |
|------------------|---------------|
| PC 38:5 Isomer B | -1.92E-01     |
| 2.31_858.59      | -1.89E-01     |
| 3.21_538.45      | -1.88E-01     |
| 3.31_542.48      | -1.86E-01     |
| 2.32_860.62      | -1.85E-01     |
| 3.18_540.47      | -1.84E-01     |
| 2.23_819.61      | -1.84E-01     |
| 3.69_971.79      | -1.82E-01     |
| 2.10_766.58      | -1.82E-01     |
| PC 40:7 Isomer B | -1.80E-01     |
| 2.39_836.67      | -1.76E-01     |
| 2.08_832.65      | -1.75E-01     |
| 1.47_569.43      | -1.71E-01     |
| 2.31_837.61      | -1.68E-01     |
| 2.50_814.68      | 1.74E-01      |
| PC 37:4          | 1.75E-01      |
| 2.26_798.59      | 1.77E-01      |
| PC 37:3          | 1.79E-01      |
| 2.49_813.57      | 1.80E-01      |
| 2.12_729.65      | 1.82E-01      |
| 2.33_780.59      | 1.83E-01      |
| 2.15_754.57      | 1.84E-01      |
| 2.13_1586.11     | 1.85E-01      |
| 2.47_749.59      | 1.85E-01      |
| SM d36:2         | 1.86E-01      |
| 2.13_782.78      | 1.86E-01      |
| PC 33:0          | 1.87E-01      |
| 2.56_774.61      | 1.87E-01      |
| 2.21_770.57      | 1.89E-01      |
| 1.98_727.58      | 1.94E-01      |

**Supplementary Table 7.** Principal component (PC) 1 loadings of significant metabolites from urine (*Biogenic Amines*) following FS-CR. Negative loadings (shaded) are correlated with **BAS1** and positive are correlated with **BAS2**.

| Variable                                     | PC 1 (46.35%) |
|----------------------------------------------|---------------|
| 1.43_137.07                                  | -1.36E-01     |
| 1.43_136.65                                  | -1.35E-01     |
| 1.43_139.08                                  | -1.33E-01     |
| 1.43_94.06                                   | -1.32E-01     |
| (2-oxo-2,3-dihydro-1H-indol-3-yl)acetic acid | -1.24E-01     |
| 0.41_146.06                                  | -1.23E-01     |
| 0.45_375.17                                  | -1.22E-01     |
| 0.41_174.05                                  | -1.21E-01     |
| 0.29_385.13                                  | -1.18E-01     |
| 2.23_195.05                                  | -1.14E-01     |
| N-Acetylmannosamine                          | -1.14E-01     |
| 1.87_349.12                                  | -1.13E-01     |
| 1.93_278.06                                  | -1.08E-01     |
| 0.29_399.14                                  | -1.07E-01     |
| 0.30_415.13                                  | -1.06E-01     |
| CMPF                                         | -1.06E-01     |
| His-Tyr                                      | -1.06E-01     |
| 1.76_176.01                                  | -1.05E-01     |
| 0.35_106.03                                  | -1.05E-01     |
| 2.01_321.08                                  | -1.05E-01     |
| 0.74_258.07                                  | -1.04E-01     |
| Ser-Arg                                      | -1.04E-01     |
| 0.53_74.02                                   | -1.03E-01     |
| 0.30_431.13                                  | -1.02E-01     |
| Ala-Pro                                      | -1.01E-01     |
| 0.37_260.11                                  | -1.00E-01     |
| 2.39_187.94                                  | -9.90E-02     |
| Threonic acid                                | -9.87E-02     |
| 1.03_135.03                                  | -9.78E-02     |
| Nicotinamide                                 | -9.75E-02     |
| 1.23_264.04                                  | -9.69E-02     |
| 0.31_415.22                                  | -9.64E-02     |
| 2.20_710.24                                  | -9.52E-02     |
| 2.18_458.05                                  | -9.34E-02     |
| 1.03_175.00                                  | -9.20E-02     |
| N-Methylhistidine                            | -9.16E-02     |
| 1.91_242.09                                  | -8.62E-02     |
| Dopamine                                     | -8.30E-02     |
| 0.36_431.22                                  | -8.26E-02     |
| 0.47_312.97                                  | -8.12E-02     |
| 1.29_495.32                                  | -8.12E-02     |
| Pyrrole-2-carboxylic acid                    | -8.07E-02     |
| 1.88_238.08                                  | -8.05E-02     |
| 0.31_503.28                                  | -7.84E-02     |
| 1.35_649.32                                  | -7.79E-02     |
| 1.42_438.23                                  | -7.77E-02     |
| Asp-Asp                                      | -7.60E-02     |
| Phe-Val                                      | 7.91E-02      |
| 0.26_241.97                                  | 8.56E-02      |

|                                         |          |
|-----------------------------------------|----------|
| 1.86_245.15                             | 8.57E-02 |
| 0.29_184.07                             | 8.67E-02 |
| 0.30_572.41                             | 8.78E-02 |
| 1.32_243.97                             | 8.81E-02 |
| 1.62_143.05                             | 9.02E-02 |
| 1.50_189.16                             | 9.04E-02 |
| 2.32_149.01                             | 9.17E-02 |
| 1.46_60.05                              | 9.20E-02 |
| 1.90_315.27                             | 9.22E-02 |
| N-Methylphenylalanine                   | 9.30E-02 |
| 0.62_407.11                             | 9.39E-02 |
| 0.29_202.08                             | 9.65E-02 |
| 1.21_306.90                             | 9.84E-02 |
| 1.86_277.08                             | 9.85E-02 |
| 1.48_314.18                             | 9.88E-02 |
| Phenyl glucuronide                      | 1.02E-01 |
| 0.54_916.55                             | 1.03E-01 |
| 1.79_245.15                             | 1.04E-01 |
| 0.62_291.99                             | 1.05E-01 |
| Tartaric acid                           | 1.05E-01 |
| Mirtazapine                             | 1.06E-01 |
| 0.43_206.08                             | 1.10E-01 |
| 4-Aminomethylcyclohexanecarboxylic acid | 1.11E-01 |
| 0.23_254.01                             | 1.13E-01 |
| 0.29_514.36                             | 1.14E-01 |
| 0.77_135.09                             | 1.14E-01 |
| 1.86_184.09                             | 1.17E-01 |
| Propoxyphene                            | 1.17E-01 |
| 0.32_460.04                             | 1.17E-01 |
| Methacholine cation                     | 1.18E-01 |
| 1.87_185.10                             | 1.18E-01 |
| 0.29_456.31                             | 1.19E-01 |
| 1.86_125.02                             | 1.20E-01 |
| 1.38_160.13                             | 1.20E-01 |
| Tyr-Phe                                 | 1.26E-01 |
| 1.39_279.08                             | 1.28E-01 |
| 1.86_200.06                             | 1.28E-01 |
| 1.86_369.10                             | 1.28E-01 |
| 1.60_196.03                             | 1.29E-01 |
| 1.30_258.17                             | 1.33E-01 |
| 1.80_205.10                             | 1.34E-01 |

---



**Supplementary Table 8.** Principal component (PC) 1 loadings of significant metabolites from stool (*Biogenic Amines*) following FS-CR. Positive loadings (shaded) are correlated with **BAS1** and negative are correlated with **BAS2**.

| Variable                    | PC 1 (54.20%) |
|-----------------------------|---------------|
| 0.31_373.15                 | -1.33E-01     |
| Prochlorperazine            | -1.28E-01     |
| 1.79_186.05                 | -1.22E-01     |
| 2.09_449.17                 | -1.17E-01     |
| 2.50_403.92                 | -1.13E-01     |
| 0.41_164.03                 | -1.10E-01     |
| 1.59_359.07                 | -1.10E-01     |
| 2.12_491.17                 | -1.09E-01     |
| 0.31_631.26                 | -1.01E-01     |
| 0.30_572.41                 | -9.95E-02     |
| 2.24_373.24                 | -9.74E-02     |
| Stachydrine                 | -9.60E-02     |
| 0.30_629.26                 | -9.30E-02     |
| 0.26_536.38                 | -8.51E-02     |
| 1.47_358.22                 | -8.37E-02     |
| 1.88_278.06                 | -7.82E-02     |
| 1.57_189.05                 | -7.31E-02     |
| 1.39_336.23                 | 6.52E-02      |
| Temozolomide                | 7.17E-02      |
| CHEMBL1616521               | 7.88E-02      |
| Glycerophosphocholine       | 8.13E-02      |
| 2-dGMP                      | 8.38E-02      |
| 0.24_126.90                 | 8.44E-02      |
| 0.33_73.00                  | 8.66E-02      |
| 0.21_490.42                 | 9.08E-02      |
| alpha-Tocopheryl acetate    | 9.10E-02      |
| 3-Pyridinemethanol          | 9.73E-02      |
| 1.59_222.04                 | 9.92E-02      |
| 0.90_219.01                 | 1.00E-01      |
| O-Acetylsalicylic acid      | 1.02E-01      |
| 1.25_703.57                 | 1.02E-01      |
| 1.00_189.98                 | 1.06E-01      |
| 1.47_184.10                 | 1.07E-01      |
| 0.91_142.99                 | 1.07E-01      |
| 0.40_213.12                 | 1.08E-01      |
| Benzene-1,2,4-triol         | 1.10E-01      |
| 0.36_509.16                 | 1.15E-01      |
| 1.39_184.10                 | 1.16E-01      |
| 1.43_317.13                 | 1.21E-01      |
| Caffeic acid                | 1.22E-01      |
| 3,4-Dihydroxybenzoic acid   | 1.24E-01      |
| 0.56_151.12                 | 1.29E-01      |
| Formononetine               | 1.30E-01      |
| Tyr-His                     | 1.30E-01      |
| 3-Hydroxyanthranilic acid   | 1.33E-01      |
| Cytosine                    | 1.37E-01      |
| Kaempferol                  | 1.37E-01      |
| 2,3-Dihydroxybenzoic acid B | 1.40E-01      |
| 0.52_151.12                 | 1.41E-01      |

|                                           |          |
|-------------------------------------------|----------|
| 1.16_577.36                               | 1.42E-01 |
| 0.46_185.09                               | 1.43E-01 |
| 0.54_244.08                               | 1.44E-01 |
| 0.85_305.96                               | 1.45E-01 |
| 1.26_539.27                               | 1.45E-01 |
| Cytarabine                                | 1.46E-01 |
| 0.46_165.14                               | 1.47E-01 |
| Clonidine                                 | 1.47E-01 |
| 1.38_631.37                               | 1.50E-01 |
| 1.26_533.24                               | 1.50E-01 |
| Glu-Ala                                   | 1.51E-01 |
| 3-(1-Pyrazolyl)-alanine                   | 1.54E-01 |
| 1.28_110.06                               | 1.55E-01 |
| 0.85_451.04                               | 1.55E-01 |
| 0.85_696.05                               | 1.55E-01 |
| N-Ethyl-4-(dimethylamino)benzylamine      | 1.56E-01 |
| Acetaminophen glucuronide                 | 1.57E-01 |
| 3-Amino-3-(4-hydroxyphenyl)propionic acid | 1.57E-01 |
| 1.87_349.12                               | 1.57E-01 |

**Supplementary Table 9.** Principal component (PC) 1 loadings of significant metabolites from serum (*Biogenic Amines*) following FS-CR. Negative loadings (shaded) are correlated with **BAS1** and positive are correlated with **BAS2**.

| Variable               | PC 1 (69.17%) |
|------------------------|---------------|
| 4-Aminobenzoic acid    | -2.29E-01     |
| 1.16_577.36            | -2.01E-01     |
| 1.66_160.11            | -1.98E-01     |
| 1.30_568.33            | -1.97E-01     |
| 1.26_568.34            | -1.97E-01     |
| 0.40_153.06            | -1.95E-01     |
| 0.52_151.12            | -1.94E-01     |
| L-Histidinol           | -1.93E-01     |
| 0.62_150.05            | -1.92E-01     |
| 1.68_192.04            | -1.81E-01     |
| 1.68_86.10             | -1.81E-01     |
| 0.31_234.97            | 1.80E-01      |
| Secnidazole            | 1.82E-01      |
| 1.32_510.35            | 1.82E-01      |
| Ezetimibe              | 1.84E-01      |
| 4-Hydroxybenzylcyanide | 1.85E-01      |
| Vanillin               | 1.85E-01      |
| 0.23_231.00            | 1.86E-01      |
| 0.26_230.99            | 1.89E-01      |
| 1.41_179.05            | 1.96E-01      |
| 1.32_482.32            | 1.99E-01      |
| 2.38_149.01            | 2.05E-01      |
| Tartaric acid          | 2.07E-01      |
| 0.58_207.05            | 2.08E-01      |
| 0.23_559.47            | 2.20E-01      |
| 0.23_557.45            | 2.21E-01      |

**Supplementary Figure 1.** Biplot of urine (*General Metabolism*) (A) before feature selection and (B) after feature selection. Red diamonds represent samples (scores), and blue triangles represent variables (loadings).

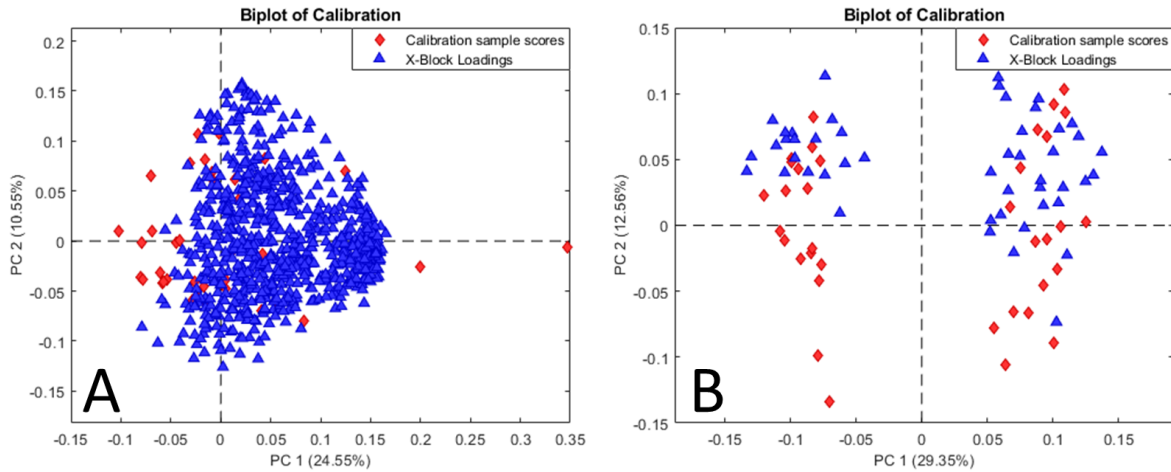

**Supplementary Figure 2.** Biplot of stool (*General Metabolism*) (A) before feature selection and (B) after feature selection. Red diamonds represent samples (scores), and blue triangles represent variables (loadings).

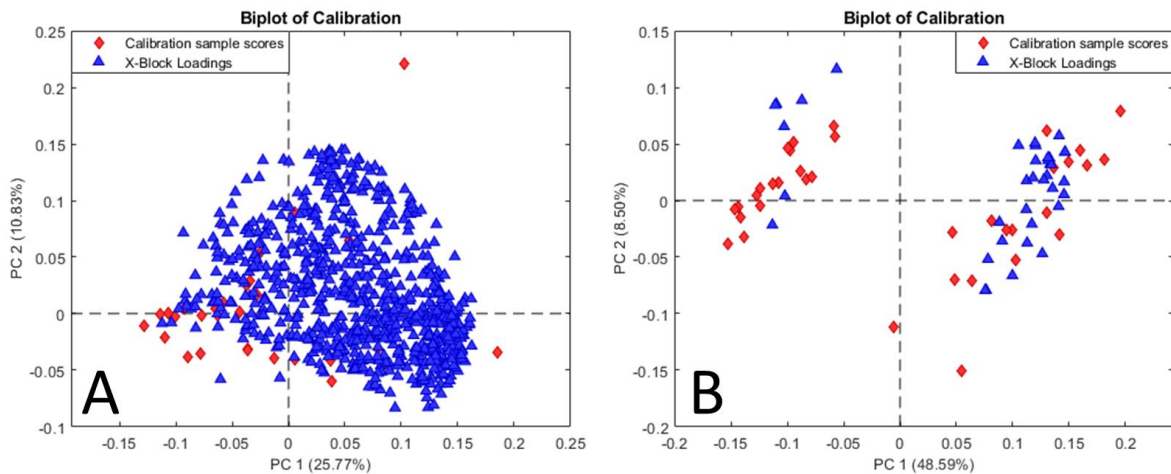

**Supplementary Figure 3.** Biplot of serum (*General Metabolism*) (A) before feature selection and (B) after feature selection. Red diamonds represent samples (scores), and blue triangles represent variables (loadings).

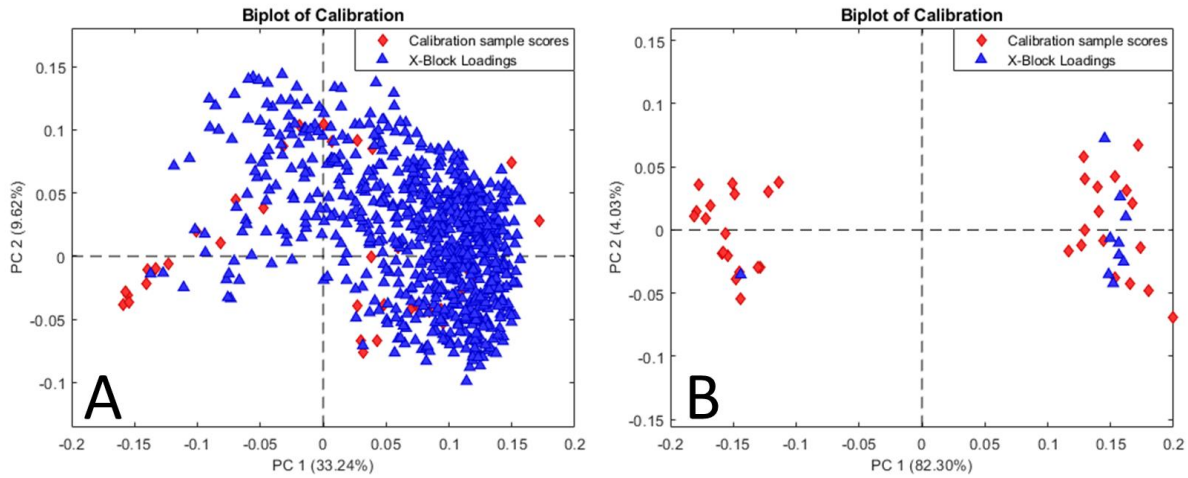

**Supplementary Figure 4.** Biplot of urine (*Complex Lipids*) (A) before feature selection and (B) after feature selection. Red diamonds represent samples (scores), and blue triangles represent variables (loadings).

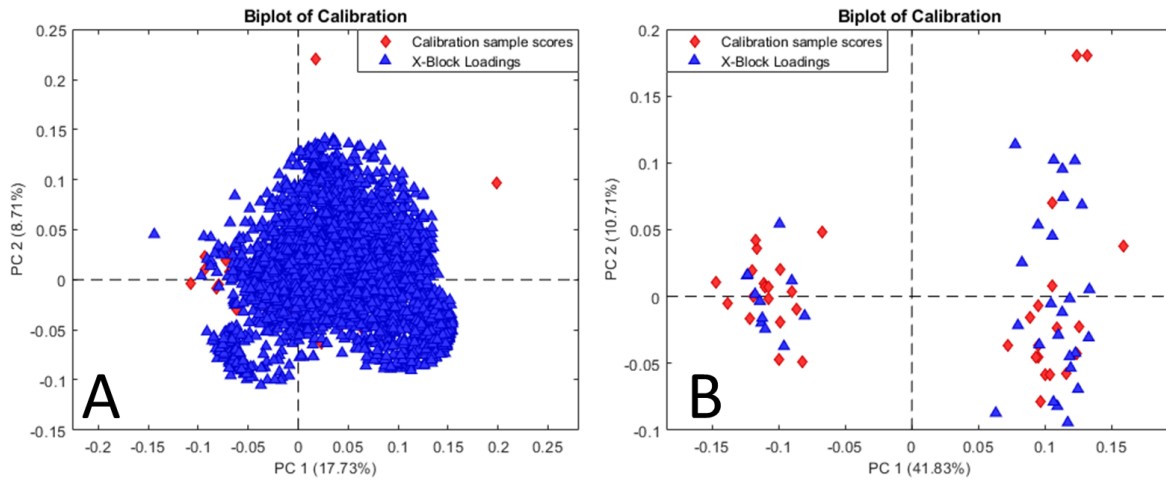

**Supplementary Figure 5.** Biplot of stool (*Complex Lipids*) (A) before feature selection and (B) after feature selection. Red diamonds represent samples (scores), and blue triangles represent variables (loadings).

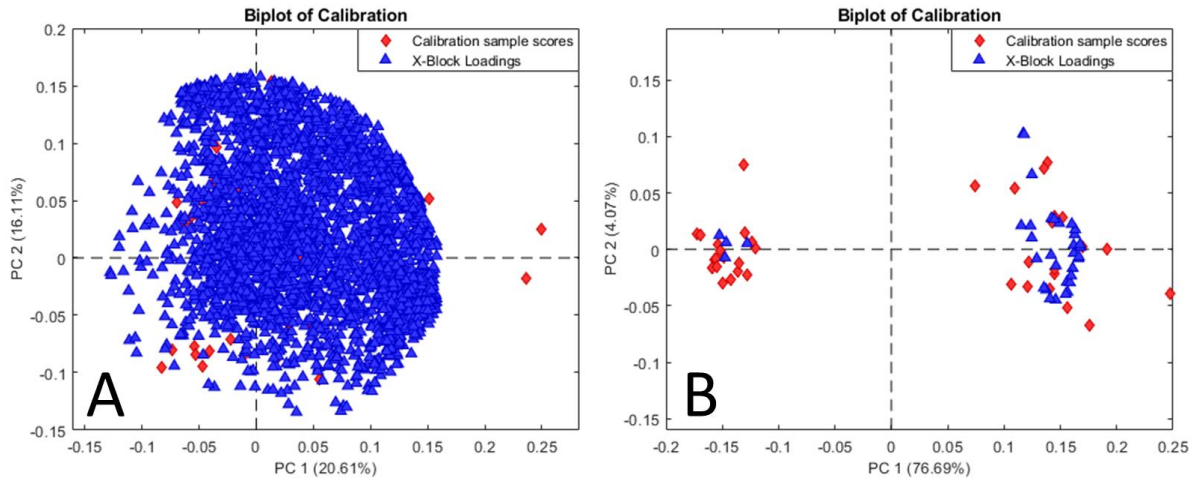

**Supplementary Figure 6.** Biplot of serum (*Complex Lipids*) (A) before feature selection and (B) after feature selection. Red diamonds represent samples (scores), and blue triangles represent variables (loadings).

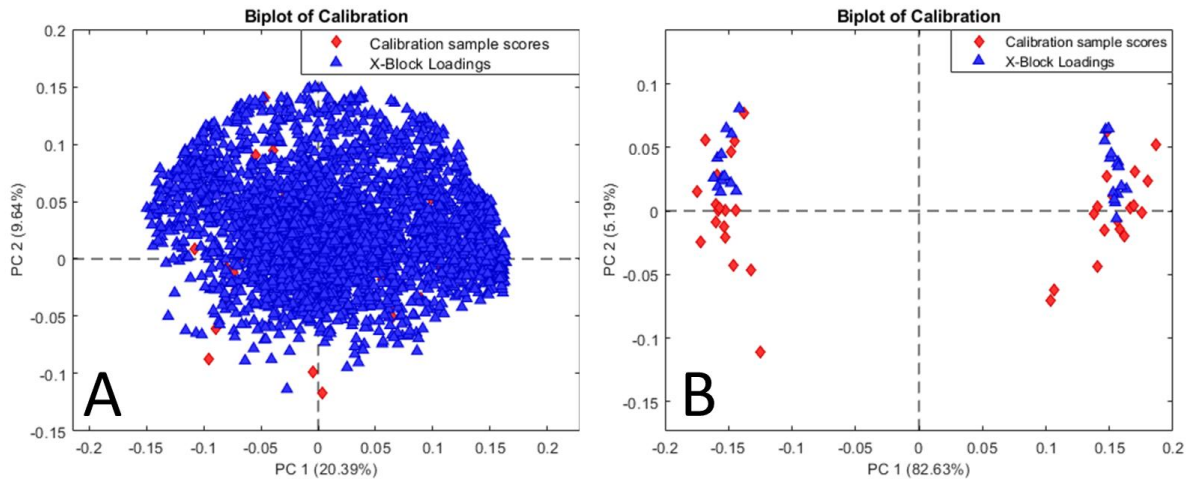

**Supplementary Figure 7.** Biplot of urine (*Biogenic Amines*) (A) before feature selection and (B) after feature selection. Red diamonds represent samples (scores), and blue triangles represent variables (loadings).

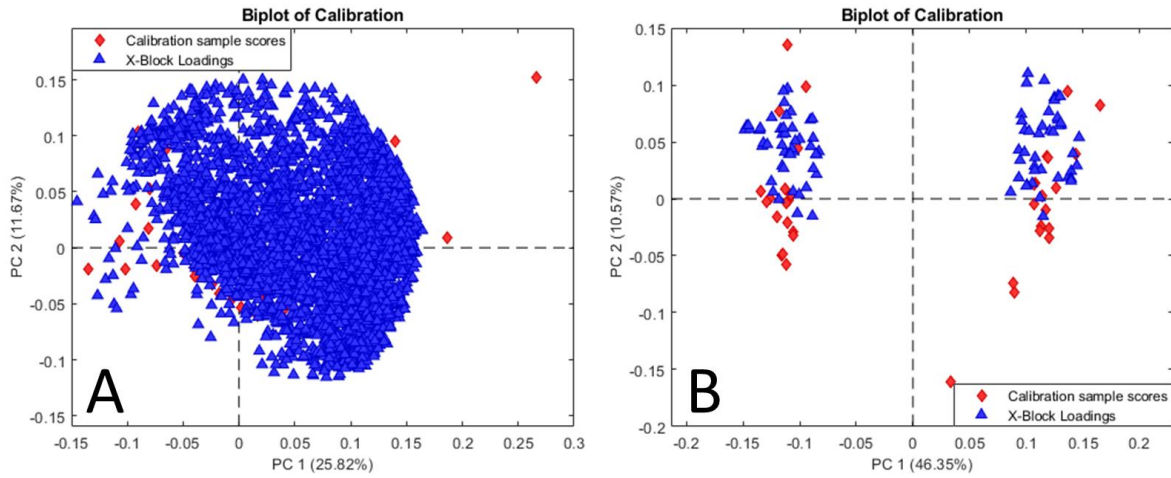

**Supplementary Figure 8.** Biplot of stool (*Biogenic Amines*) (A) before feature selection and (B) after feature selection. Red diamonds represent samples (scores), and blue triangles represent variables (loadings).

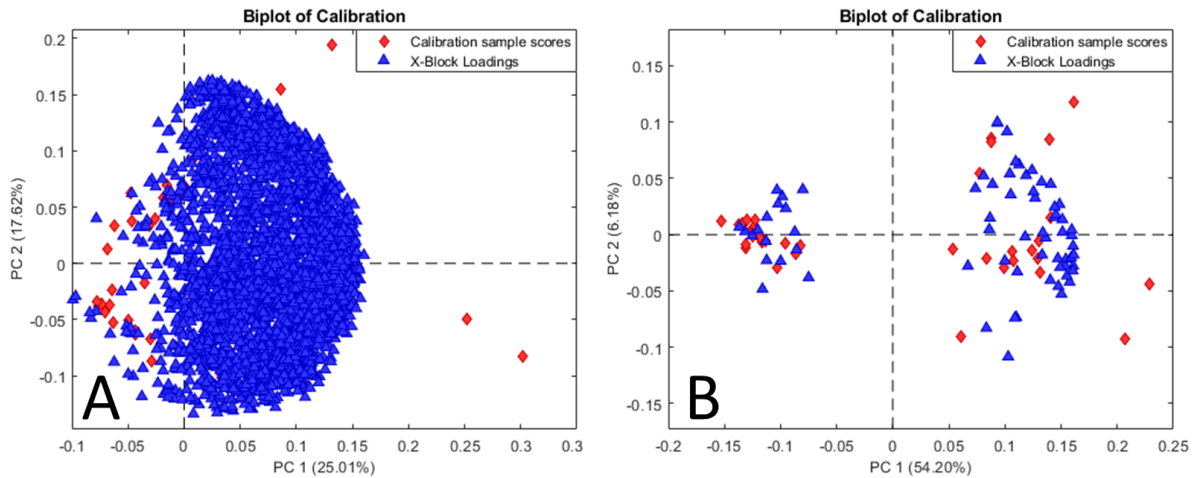

**Supplementary Figure 9.** Biplot of serum (*Biogenic Amines*) (**A**) before feature selection and (**B**) after feature selection. Red diamonds represent samples (scores), and blue triangles represent variables (loadings).

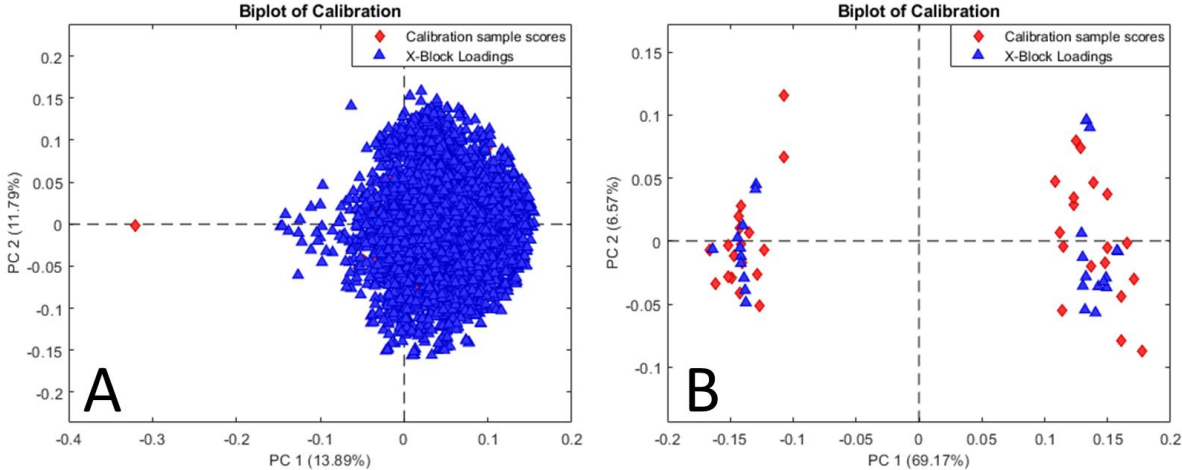

Supplement: MOESM1 [file 41598_2024_71202_MOESM1_ESM.pdf]
